# Supplementary material
Source: MDPI journal article supplement (https://www.mdpi.com/2073-4441/16/10/1383)
Supplement: s1 [file s1]

## Supplementary Material

**Tab. A.** CPUE values at the sampling points in the rainy period.

| Species                                                        | Tie<br>(I) | Tie<br>(II) | Tie<br>(III) | Cap  | Sor | Pei  | Total       |
|----------------------------------------------------------------|------------|-------------|--------------|------|-----|------|-------------|
| <b>CHARACIFORMES</b>                                           |            |             |              |      |     |      |             |
| <b>Acestrorhynchidae</b>                                       |            |             |              |      |     |      |             |
| <i>Acestrorhynchus lacustris</i> (Lütken, 1875)                | 0.0        | 0.0         | 0.0          | 0.0  | 0.0 | 0.0  | <b>0.0</b>  |
| <b>Anostomidae</b>                                             |            |             |              |      |     |      |             |
| <i>Leporinus friderici</i> (Bloch, 1794)                       | 0.0        | 0.0         | 0.0          | 0.0  | 0.0 | 2.4  | <b>2.4</b>  |
| <i>Leporinus lacustris</i> Amaral Campos, 1945                 | 0.0        | 0.0         | 0.0          | 0.0  | 0.0 | 2.4  | <b>2.4</b>  |
| <i>Megaleporinus obtusidens</i> (Valenciennes, 1837)           | 0.0        | 0.0         | 0.0          | 0.0  | 0.0 | 12.2 | <b>12.2</b> |
| <i>Schizodon intermedius</i> Garavello & Britski, 1990         | 0.0        | 0.0         | 0.0          | 0.0  | 0.0 | 2.4  | <b>2.4</b>  |
| <b>Characidae</b>                                              |            |             |              |      |     |      |             |
| <i>Astyanax lacustris</i> (Lütken, 1875)                       | 0.0        | 0.0         | 0.0          | 10.3 | 2.5 | 2.4  | <b>15.3</b> |
| <i>Psalidodon schubarti</i> (Britski 1964)                     | 0.0        | 0.0         | 0.0          | 2.6  | 0.0 | 0.0  | <b>2.6</b>  |
| <i>Roebooides descalvadensis</i> Fowler, 1932                  | 0.0        | 0.0         | 0.0          | 5.1  | 7.6 | 12.2 | <b>24.9</b> |
| <b>Curimatidae</b>                                             |            |             |              |      |     |      |             |
| <i>Cyphocharax nagelii</i> (Steindachner, 1881)                | 0.0        | 0.0         | 0.0          | 0.0  | 0.0 | 2.4  | <b>2.4</b>  |
| <i>Steindachmerina insculpta</i> (Fernández-Yépez, 1948)       | 0.0        | 0.0         | 0.0          | 0.0  | 2.5 | 0.0  | <b>2.5</b>  |
| <b>Erythrinidae</b>                                            |            |             |              |      |     |      |             |
| <i>Hoplias malabaricus</i> (Bloch, 1794)                       | 0.0        | 0.0         | 0.0          | 0.0  | 0.0 | 2.4  | <b>2.4</b>  |
| <b>Parodontidae</b>                                            |            |             |              |      |     |      |             |
| <i>Apareiodon</i> sp.                                          | 0.0        | 0.0         | 0.0          | 0.0  | 0.0 | 0.0  | <b>0.0</b>  |
| <b>Prochilodontidae</b>                                        |            |             |              |      |     |      |             |
| <i>Prochilodus lineatus</i> (Valenciennes, 1837)               | 0.0        | 2.5         | 0.0          | 28.3 | 0.0 | 12.2 | <b>43.0</b> |
| <b>Serrasalminidae</b>                                         |            |             |              |      |     |      |             |
| <i>Serrasalmus maculatus</i> Kner, 1858                        | 0.0        | 0.0         | 0.0          | 0.0  | 0.0 | 0.0  | <b>0.0</b>  |
| <b>CICHLIFORMES</b>                                            |            |             |              |      |     |      |             |
| <b>Cichlidae</b>                                               |            |             |              |      |     |      |             |
| <i>Geophagus brasiliensis</i> (Quoy & Gaimard, 1824)           | 0.0        | 0.0         | 0.0          | 0.0  | 0.0 | 0.0  | <b>0.0</b>  |
| <i>Oreochromis niloticus</i> (Linnaeus, 1758)                  | 0.0        | 0.0         | 0.0          | 0.0  | 0.0 | 0.0  | <b>0.0</b>  |
| <i>Saxatilia britskii</i> (Kullander 1982)                     | 0.0        | 0.0         | 0.0          | 0.0  | 0.0 | 0.0  | <b>0.0</b>  |
| <b>GYMNOTIFORMES</b>                                           |            |             |              |      |     |      |             |
| <b>Gymnotidae</b>                                              |            |             |              |      |     |      |             |
| <i>Gymnotus cuia</i> Craig, Malabarba, Crampton & Albert, 2018 | 0.0        | 0.0         | 0.0          | 0.0  | 0.0 | 0.0  | <b>0.0</b>  |
| <b>SILURIFORMES</b>                                            |            |             |              |      |     |      |             |
| <b>Callichthyidae</b>                                          |            |             |              |      |     |      |             |
| <i>Hoplosternum littorale</i> (Hancock, 1828)                  | 17.6       | 0.0         | 60.1         | 0.0  | 0.0 | 2.4  | <b>80.2</b> |
| <b>Loricariidae</b>                                            |            |             |              |      |     |      |             |
| <i>Hypostomus ancistroides</i> (Ihering, 1911)                 | 0.0        | 0.0         | 0.0          | 0.0  | 0.0 | 0.0  | <b>0.0</b>  |
| <i>Hypostomus hermanni</i> (Ihering, 1905)                     | 0.0        | 0.0         | 0.0          | 0.0  | 2.5 | 0.0  | <b>2.5</b>  |
| <i>Hypostomus regani</i> (Ihering, 1905)                       | 0.0        | 0.0         | 0.0          | 0.0  | 0.0 | 0.0  | <b>0.0</b>  |
| <i>Hypostomus strigaticeps</i> (Regan, 1908)                   | 0.0        | 0.0         | 0.0          | 0.0  | 0.0 | 0.0  | <b>0.0</b>  |
| <i>Proloricaria prolixa</i> (Isbrücker & Nijssen, 1978)        | 0.0        | 0.0         | 0.0          | 0.0  | 2.5 | 0.0  | <b>2.5</b>  |
| <i>Pterygoplichthys ambrosetti</i> (Holmberg, 1893)            | 5.0        | 0.0         | 5.5          | 0.0  | 0.0 | 0.0  | <b>10.5</b> |

|              |             |            |             |             |             |             |              |
|--------------|-------------|------------|-------------|-------------|-------------|-------------|--------------|
| <b>Total</b> | <b>22.7</b> | <b>2.5</b> | <b>65.5</b> | <b>46.3</b> | <b>17.7</b> | <b>53.7</b> | <b>208.5</b> |
|--------------|-------------|------------|-------------|-------------|-------------|-------------|--------------|

**Tab. B.** CPUEn values at the sampling points in the dry period.

| <b>Species</b>                                                 | <b>Tie<br/>(I)</b> | <b>Tie<br/>(II)</b> | <b>Tie<br/>(III<br/>)</b> | <b>Cap</b> | <b>Sor</b> | <b>Pei</b> | <b>Tota<br/>l</b> |
|----------------------------------------------------------------|--------------------|---------------------|---------------------------|------------|------------|------------|-------------------|
| <b>CHARACIFORMES</b>                                           |                    |                     |                           |            |            |            |                   |
| <b>Acestrorhynchidae</b>                                       |                    |                     |                           |            |            |            |                   |
| <i>Acestrorhynchus lacustris</i> (Lütken, 1875)                | 0.0                | 0.0                 | 0.0                       | 0.0        | 0.0        | 2.5        | <b>2.5</b>        |
| <b>Anostomidae</b>                                             |                    |                     |                           |            |            |            |                   |
| <i>Leporinus friderici</i> (Bloch, 1794)                       | 0.0                | 0.0                 | 0.0                       | 0.0        | 2.4        | 2.5        | <b>4.9</b>        |
| <i>Leporinus lacustris</i> Amaral Campos, 1945                 | 0.0                | 0.0                 | 0.0                       | 0.0        | 0.0        | 7.6        | <b>7.6</b>        |
| <i>Megaleporinus obtusidens</i> (Valenciennes, 1837)           | 0.0                | 0.0                 | 0.0                       | 0.0        | 0.0        | 0.0        | <b>0.0</b>        |
| <i>Schizodon intermedius</i> Garavello & Britski, 1990         | 0.0                | 0.0                 | 0.0                       | 0.0        | 0.0        | 2.5        | <b>2.5</b>        |
| <b>Characidae</b>                                              |                    |                     |                           |            |            |            |                   |
| <i>Astyanax lacustris</i> (Lütken, 1875)                       | 0.0                | 0.0                 | 0.0                       | 2.5        | 2.4        | 2.5        | <b>7.4</b>        |
| <i>Psalidodon schubarti</i> (Britski 1964)                     | 0.0                | 0.0                 | 0.0                       | 0.0        | 0.0        | 0.0        | <b>0.0</b>        |
| <i>Roeboides descalvadensis</i> Fowler, 1932                   | 0.0                | 0.0                 | 0.0                       | 12.6       | 0.0        | 5.1        | <b>17.7</b>       |
| <b>Curimatidae</b>                                             |                    |                     |                           |            |            |            |                   |
| <i>Cyphocharax nagelii</i> (Steindachner, 1881)                | 0.0                | 0.0                 | 0.0                       | 0.0        | 11.9       | 0.0        | <b>11.9</b>       |
| <i>Steindachnerina insculpta</i> (Fernández-Yépez, 1948)       | 0.0                | 0.0                 | 0.0                       | 7.6        | 0.0        | 0.0        | <b>7.6</b>        |
| <b>Erythrinidae</b>                                            |                    |                     |                           |            |            |            |                   |
| <i>Hoplias malabaricus</i> (Bloch, 1794)                       | 0.0                | 0.0                 | 0.0                       | 0.0        | 2.4        | 30.3       | <b>32.7</b>       |
| <b>Parodontidae</b>                                            |                    |                     |                           |            |            |            |                   |
| <i>Apareiodon</i> sp.                                          | 0.0                | 0.0                 | 0.0                       | 5.0        | 0.0        | 0.0        | <b>5.0</b>        |
| <b>Prochilodontidae</b>                                        |                    |                     |                           |            |            |            |                   |
| <i>Prochilodus lineatus</i> (Valenciennes, 1837)               | 12.<br>0           | 8.1                 | 19.5                      | 30.3       | 2.4        | 10.1       | <b>82.3</b>       |
| <b>Serrasalminidae</b>                                         |                    |                     |                           |            |            |            |                   |
| <i>Serrasalmus maculatus</i> Kner, 1858                        | 0.0                | 0.0                 | 0.0                       | 0.0        | 0.0        | 5.1        | <b>5.1</b>        |
| <b>CICHLIFORMES</b>                                            |                    |                     |                           |            |            |            |                   |
| <b>Cichlidae</b>                                               |                    |                     |                           |            |            |            |                   |
| <i>Geophagus brasiliensis</i> (Quoy & Gaimard, 1824)           | 0.0                | 0.0                 | 0.0                       | 2.5        | 4.7        | 0.0        | <b>7.3</b>        |
| <i>Oreochromis niloticus</i> (Linnaeus, 1758)                  | 0.0                | 0.0                 | 0.0                       | 2.5        | 0.0        | 0.0        | <b>2.5</b>        |
| <i>Saxatilia britskii</i> (Kullander 1982)                     | 0.0                | 0.0                 | 0.0                       | 0.0        | 0.0        | 5.1        | <b>5.1</b>        |
| <b>GYMNOTIFORMES</b>                                           |                    |                     |                           |            |            |            |                   |
| <b>Gymnotidae</b>                                              |                    |                     |                           |            |            |            |                   |
| <i>Gymnotus cuia</i> Craig, Malabarba, Crampton & Albert, 2018 | 0.0                | 0.0                 | 4.9                       | 0.0        | 0.0        | 7.6        | <b>12.4</b>       |
| <b>SILURIFORMES</b>                                            |                    |                     |                           |            |            |            |                   |
| <b>Callichthyidae</b>                                          |                    |                     |                           |            |            |            |                   |
| <i>Hoplosternum littorale</i> (Hancock, 1828)                  | 26.<br>4           | 13.<br>5            | 55.9                      | 2.5        | 0.0        | 22.7       | <b>121.1</b>      |
| <b>Loricariidae</b>                                            |                    |                     |                           |            |            |            |                   |
| <i>Hypostomus ancistroides</i> (Ihering, 1911)                 | 0.0                | 10.<br>8            | 0.0                       | 80.8       | 4.7        | 0.0        | <b>96.3</b>       |
| <i>Hypostomus hermanni</i> (Ihering, 1905)                     | 0.0                | 0.0                 | 0.0                       | 0.0        | 61.7       | 0.0        | <b>61.7</b>       |

|                                                         |             |             |             |              |              |              |              |
|---------------------------------------------------------|-------------|-------------|-------------|--------------|--------------|--------------|--------------|
| <i>Hypostomus regani</i> (Ihering, 1905)                | 0.0         | 0.0         | 0.0         | 0.0          | 26.1         | 0.0          | <b>26.1</b>  |
| <i>Hypostomus strigaticeps</i> (Regan, 1908)            | 0.0         | 0.0         | 0.0         | 212.0        | 0.0          | 0.0          | <b>212.0</b> |
| <i>Protoricaria prolixa</i> (Isbrücker & Nijssen, 1978) | 0.0         | 0.0         | 0.0         | 0.0          | 7.1          | 0.0          | <b>7.1</b>   |
| <i>Pterygoplichthys ambrosettii</i> (Holmberg, 1893)    | 0.0         | 0.0         | 0.0         | 0.0          | 0.0          | 0.0          | <b>0.0</b>   |
| <b>Total</b>                                            | <b>38.4</b> | <b>32.5</b> | <b>80.2</b> | <b>358.4</b> | <b>125.7</b> | <b>103.6</b> | <b>738.8</b> |

**Tab. C.** CPUEb values at the sampling points in the rainy period.

| Species                                                        | Tie (I) | Tie (II) | Tie (III) | Cap     | Sor  | Pei    | Total          |
|----------------------------------------------------------------|---------|----------|-----------|---------|------|--------|----------------|
| <b>CHARACIFORMES</b>                                           |         |          |           |         |      |        |                |
| <b>Acestrorhynchidae</b>                                       |         |          |           |         |      |        |                |
| <i>Acestrorhynchus lacustris</i> (Lütken, 1875)                | 0.0     | 0.0      | 0.0       | 0.0     | 0.0  | 0.0    | <b>0.0</b>     |
| <b>Anostomidae</b>                                             |         |          |           |         |      |        |                |
| <i>Leporinus friderici</i> (Bloch, 1794)                       | 0.0     | 0.0      | 0.0       | 0.0     | 0.0  | 439.3  | <b>439.3</b>   |
| <i>Leporinus lacustris</i> Amaral Campos, 1945                 | 0.0     | 0.0      | 0.0       | 0.0     | 0.0  | 351.5  | <b>351.5</b>   |
| <i>Megaleporinus obtusidens</i> (Valenciennes, 1837)           | 0.0     | 0.0      | 0.0       | 0.0     | 0.0  | 4557.0 | <b>4557.0</b>  |
| <i>Schizodon intermedius</i> Garavello & Britski, 1990         | 0.0     | 0.0      | 0.0       | 0.0     | 0.0  | 522.3  | <b>522.3</b>   |
| <b>Characidae</b>                                              |         |          |           |         |      |        |                |
| <i>Astyanax lacustris</i> (Lütken, 1875)                       | 0.0     | 0.0      | 0.0       | 298.6   | 35.4 | 63.5   | <b>397.5</b>   |
| <i>Psalidodon schubarti</i> (Britski 1964)                     | 0.0     | 0.0      | 0.0       | 46.3    | 0.0  | 0.0    | <b>46.3</b>    |
| <i>Roeboides descavadensis</i> Fowler, 1932                    | 0.0     | 0.0      | 0.0       | 61.8    | 68.3 | 111.1  | <b>241.2</b>   |
| <b>Curimatidae</b>                                             |         |          |           |         |      |        |                |
| <i>Cyphocharax nagei</i> (Steindachner, 1881)                  | 0.0     | 0.0      | 0.0       | 0.0     | 0.0  | 90.3   | <b>90.3</b>    |
| <i>Steindachnerina insculpta</i> (Fernández-Yépez, 1948)       | 0.0     | 0.0      | 0.0       | 0.0     | 73.4 | 0.0    | <b>73.4</b>    |
| <b>Erythrinidae</b>                                            |         |          |           |         |      |        |                |
| <i>Hoplias malabaricus</i> (Bloch, 1794)                       | 0.0     | 0.0      | 0.0       | 0.0     | 0.0  | 205.0  | <b>205.0</b>   |
| <b>Parodontidae</b>                                            |         |          |           |         |      |        |                |
| <i>Apareiodon</i> sp.                                          | 0.0     | 0.0      | 0.0       | 0.0     | 0.0  | 0.0    | <b>0.0</b>     |
| <b>Prochilodontidae</b>                                        |         |          |           |         |      |        |                |
| <i>Prochilodus lineatus</i> (Valenciennes, 1837)               | 0.0     | 1259.5   | 0.0       | 19734.9 | 0.0  | 9802.3 | <b>30796.7</b> |
| <b>Serrasalminidae</b>                                         |         |          |           |         |      |        |                |
| <i>Serrasalmus maculatus</i> Kner, 1858                        | 0.0     | 0.0      | 0.0       | 0.0     | 0.0  | 0.0    | <b>0.0</b>     |
| <b>CICHLIFORMES</b>                                            |         |          |           |         |      |        |                |
| <b>Cichlidae</b>                                               |         |          |           |         |      |        |                |
| <i>Geophagus brasiliensis</i> (Quoy & Gaimard, 1824)           | 0.0     | 0.0      | 0.0       | 0.0     | 0.0  | 0.0    | <b>0.0</b>     |
| <i>Oreochromis niloticus</i> (Linnaeus, 1758)                  | 0.0     | 0.0      | 0.0       | 0.0     | 0.0  | 0.0    | <b>0.0</b>     |
| <i>Saxatilia britskii</i> (Kullander 1982)                     | 0.0     | 0.0      | 0.0       | 0.0     | 0.0  | 0.0    | <b>0.0</b>     |
| <b>GYMNOTIFORMES</b>                                           |         |          |           |         |      |        |                |
| <b>Gymnotidae</b>                                              |         |          |           |         |      |        |                |
| <i>Gymnotus cuia</i> Craig, Malabarba, Crampton & Albert, 2018 | 0.0     | 0.0      | 0.0       | 0.0     | 0.0  | 0.0    | <b>0.0</b>     |
| <b>SILURIFORMES</b>                                            |         |          |           |         |      |        |                |
| <b>Callichthyidae</b>                                          |         |          |           |         |      |        |                |
| <i>Hoplosternum littorale</i> (Hancock, 1828)                  | 1609.7  | 0.0      | 8537.6    | 0.0     | 0.0  | 214.8  | <b>10362.0</b> |
| <b>Loricariidae</b>                                            |         |          |           |         |      |        |                |
| <i>Hypostomus ancistroides</i> (Ihering, 1911)                 | 0.0     | 0.0      | 0.0       | 0.0     | 0.0  | 0.0    | <b>0.0</b>     |

|                                                         |               |               |               |                |               |                |                |
|---------------------------------------------------------|---------------|---------------|---------------|----------------|---------------|----------------|----------------|
| <i>Hypostomus hermanni</i> (Ihering, 1905)              | 0.0           | 0.0           | 0.0           | 0.0            | 159.5         | 0.0            | <b>159.5</b>   |
| <i>Hypostomus regani</i> (Ihering, 1905)                | 0.0           | 0.0           | 0.0           | 0.0            | 0.0           | 0.0            | <b>0.0</b>     |
| <i>Hypostomus strigaticeps</i> (Regan, 1908)            | 0.0           | 0.0           | 0.0           | 0.0            | 0.0           | 0.0            | <b>0.0</b>     |
| <i>Protoricaria proluxa</i> (Isbrücker & Nijssen, 1978) | 0.0           | 0.0           | 0.0           | 0.0            | 802.4         | 0.0            | <b>802.4</b>   |
| <i>Pterygoplichthys ambrosettii</i> (Holmberg, 1893)    | 2332.6        | 0.0           | 106.5         | 0.0            | 0.0           | 0.0            | <b>2439.1</b>  |
| <b>Total</b>                                            | <b>3942.3</b> | <b>1259.5</b> | <b>8644.1</b> | <b>20141.6</b> | <b>1139.1</b> | <b>16357.2</b> | <b>51483.7</b> |

**Tab. D.** CPUEb values at the sampling points in the dry period.

| <b>Species</b>                                                 | <b>Tie<br/>(I)</b> | <b>Tie<br/>(II)</b> | <b>Tie<br/>(III)</b> | <b>Cap</b> | <b>Sor</b> | <b>Pei</b> | <b>Total</b>   |
|----------------------------------------------------------------|--------------------|---------------------|----------------------|------------|------------|------------|----------------|
| <b>CHARACIFORMES</b>                                           |                    |                     |                      |            |            |            |                |
| <b>Acestrorhynchidae</b>                                       |                    |                     |                      |            |            |            |                |
| <i>Acestrorhynchus lacustris</i> (Lütken, 1875)                | 0.0                | 0.0                 | 0.0                  | 0.0        | 0.0        | -          | <b>0.0</b>     |
| <b>Anostomidae</b>                                             |                    |                     |                      |            |            |            |                |
| <i>Leporinus friderici</i> (Bloch, 1794)                       | 0.0                | 0.0                 | 0.0                  | 0.0        | 341.5      | -          | <b>341.5</b>   |
| <i>Leporinus lacustris</i> Amaral Campos, 1945                 | 0.0                | 0.0                 | 0.0                  | 0.0        | 0.0        | 800.9      | <b>800.9</b>   |
| <i>Megaleporinus obtusidens</i> (Valenciennes, 1837)           | 0.0                | 0.0                 | 0.0                  | 0.0        | 0.0        | 0.0        | <b>0.0</b>     |
| <i>Schizodon intermedius</i> Garavello & Britski, 1990         | 0.0                | 0.0                 | 0.0                  | 0.0        | 0.0        | -          | <b>0.0</b>     |
| <b>Characidae</b>                                              |                    |                     |                      |            |            |            |                |
| <i>Astyanax lacustris</i> (Lütken, 1875)                       | 0.0                | 0.0                 | 0.0                  | -          | 23.7       | 22.7       | <b>46.5</b>    |
| <i>Psalidodon schubarti</i> (Britski 1964)                     | 0.0                | 0.0                 | 0.0                  | 0.0        | 0.0        | 0.0        | <b>0.0</b>     |
| <i>Roeboides descavadensis</i> Fowler, 1932                    | 0.0                | 0.0                 | 0.0                  | 95.9       | 0.0        | -          | <b>95.9</b>    |
| <b>Curimatidae</b>                                             |                    |                     |                      |            |            |            |                |
| <i>Cyphocharax nagelii</i> (Steindachner, 1881)                | 0.0                | 0.0                 | 0.0                  | 0.0        | 796.9      | 0.0        | <b>796.9</b>   |
| <i>Steindachnerina insculpta</i> (Fernández-Yépez, 1948)       | 0.0                | 0.0                 | 0.0                  | 98.4       | 0.0        | 0.0        | <b>98.4</b>    |
| <b>Erythrinidae</b>                                            |                    |                     |                      |            |            |            |                |
| <i>Hoplias malabaricus</i> (Bloch, 1794)                       | 0.0                | 0.0                 | 0.0                  | 0.0        | 1083.8     | 11179.2    | <b>12263.1</b> |
| <b>Parodontidae</b>                                            |                    |                     |                      |            |            |            |                |
| <i>Apareiodon</i> sp.                                          | 0.0                | 0.0                 | 0.0                  | 128.7      | 0.0        | 0.0        | <b>128.7</b>   |
| <b>Prochilodontidae</b>                                        |                    |                     |                      |            |            |            |                |
| <i>Prochilodus lineatus</i> (Valenciennes, 1837)               | 4137.9             | 768.4               | 5770.4               | 17147.5    | 457.7      | 5383.7     | <b>33665.6</b> |
| <b>Serrasalminidae</b>                                         |                    |                     |                      |            |            |            |                |
| <i>Serrasalmus maculatus</i> Kner, 1858                        | 0.0                | 0.0                 | 0.0                  | 0.0        | 0.0        | 1063.6     | <b>1063.6</b>  |
| <b>CICHLIFORMES</b>                                            |                    |                     |                      |            |            |            |                |
| <b>Cichlidae</b>                                               |                    |                     |                      |            |            |            |                |
| <i>Geophagus brasiliensis</i> (Quoy & Gaimard, 1824)           | 0.0                | 0.0                 | 0.0                  | 63.1       | 645.1      | 0.0        | <b>708.2</b>   |
| <i>Oreochromis niloticus</i> (Linnaeus, 1758)                  | 0.0                | 0.0                 | 0.0                  | 2478.5     | 0.0        | 0.0        | <b>2478.5</b>  |
| <i>Saxatilia britskii</i> (Kullander 1982)                     | 0.0                | 0.0                 | 0.0                  | 0.0        | 0.0        | 202.1      | <b>202.1</b>   |
| <b>GYMNOTIFORMES</b>                                           |                    |                     |                      |            |            |            |                |
| <b>Gymnotidae</b>                                              |                    |                     |                      |            |            |            |                |
| <i>Gymnotus cuia</i> Craig, Malabarba, Crampton & Albert, 2018 | 0.0                | 0.0                 | 177.5                | 0.0        | 0.0        | 252.6      | <b>430.2</b>   |
| <b>SILURIFORMES</b>                                            |                    |                     |                      |            |            |            |                |
| <b>Callichthyidae</b>                                          |                    |                     |                      |            |            |            |                |
| <i>Hoplosternum littorale</i> (Hancock, 1828)                  | 4766.8             | 852.2               | 8352.8               | 600.7      | 0.0        | 2288.9     | <b>16861.4</b> |
| <b>Loricariidae</b>                                            |                    |                     |                      |            |            |            |                |
| <i>Hypostomus ancistroides</i> (Ihering, 1911)                 | 0.0                | 1371.7              | 0.0                  | 4669.3     | 441.1      | 0.0        | <b>6482.1</b>  |
| <i>Hypostomus hermanni</i> (Ihering, 1905)                     | 0.0                | 0.0                 | 0.0                  | 0.0        | 4553.6     | 0.0        | <b>4553.6</b>  |

|                                                         |               |               |                |                |                |                |                 |
|---------------------------------------------------------|---------------|---------------|----------------|----------------|----------------|----------------|-----------------|
| <i>Hypostomus regani</i> (Ihering, 1905)                | 0.0           | 0.0           | 0.0            | 0.0            | 4878.5         | 0.0            | <b>4878.5</b>   |
| <i>Hypostomus strigaticeps</i> (Regan, 1908)            | 0.0           | 0.0           | 0.0            | 44991.5        | 0.0            | 0.0            | <b>44991.5</b>  |
| <i>Proloricaria proluxa</i> (Isbrücker & Nijssen, 1978) | 0.0           | 0.0           | 0.0            | 0.0            | 884.6          | 0.0            | <b>884.6</b>    |
| <i>Pterygoplichthys ambrosettii</i> (Holmberg, 1893)    | 0.0           | 0.0           | 0.0            | 0.0            | 0.0            | 0.0            | <b>0.0</b>      |
| <b>Total</b>                                            | <b>8904.7</b> | <b>2992.3</b> | <b>14300.7</b> | <b>70273.6</b> | <b>14106.6</b> | <b>21193.8</b> | <b>131771.7</b> |
